# Supplementary material for: Phytochemical Investigation of Equisetum arvense and Evaluation of Their Anti-Inflammatory Potential in TNFα/INFγ-Stimulated Keratinocytes
Source: MDPI journal article supplement (doi:10.3390/ph16101478), 2023-10-16

## Supporting Information

---

# Phytochemical Investigation of *Equisetum arvense* and Evaluation of their Anti-inflammatory Potential in TNF $\alpha$ /INF $\gamma$ -stimulated keratinocytes

Se Yun Jeong <sup>1,†</sup>, Hyung-Seok Yu <sup>2,†</sup>, Moon-Jin Ra <sup>3</sup>, Sang-Mi Jung <sup>3</sup>, Jeong-Nam Yu <sup>4</sup>, Jin-Chul Kim <sup>2,5,\*</sup> and Ki Hyun Kim <sup>1,\*</sup>

<sup>1</sup>School of Pharmacy, Sungkyunkwan University, Suwon 16419, Republic of Korea; dlawktkark@naver.com (S.Y.J.)

<sup>2</sup>Natural Product Research Institute, Korea Institute of Science and Technology, Gangneung 25451, Republic of Korea; hsyu1207@kist.re.kr (H.S.Y.)

<sup>3</sup>Hongcheon Institute of Medicinal Herb, Hongcheon-gun, Gangwon-do 25142, Republic of Korea; ramj90@himh.re.kr (M.J.R.); sgmo77@naver.com (S.M.J.)

<sup>4</sup>Nakdonggang National Institute of Biological Resources, Sangju, Gyeongsangbuk-do 37242, Republic of Korea; susia000@nnibr.re.kr (J.N.Y.)

<sup>5</sup>Division of Bio-Medical Science and Technology, University of Science and Technology (UST), Daejeon 34113, Republic of Korea

\*Correspondence: jckim@kist.re.kr (J.C.K.); khkim83@skku.edu (K.H.K.); +82-31-290-7700 (K.H.K.)

<sup>†</sup>These authors contributed equally to this study

## Supporting Information Contents:

|                                                                                                             |     |
|-------------------------------------------------------------------------------------------------------------|-----|
| <b>Figure S1.</b> The HR-ESI-MS data of <b>1</b> .....                                                      | S3  |
| <b>Figure S2.</b> The <sup>1</sup> H NMR spectrum of <b>1</b> (DMSO- <i>d</i> <sub>6</sub> 850 MHz) .....   | S4  |
| <b>Figure S3.</b> The HR-ESI-MS data of <b>2</b> .....                                                      | S5  |
| <b>Figure S4.</b> The <sup>1</sup> H NMR spectrum of <b>2</b> (DMSO- <i>d</i> <sub>6</sub> , 850 MHz) ..... | S6  |
| <b>Figure S5.</b> The HR-ESI-MS data of <b>3</b> .....                                                      | S7  |
| <b>Figure S6.</b> The <sup>1</sup> H NMR spectrum of <b>3</b> (DMSO- <i>d</i> <sub>6</sub> , 850 MHz) ..... | S8  |
| <b>Figure S7.</b> The HR-ESI-MS data of <b>4</b> .....                                                      | S9  |
| <b>Figure S8.</b> The <sup>1</sup> H NMR spectrum of <b>4</b> (DMSO- <i>d</i> <sub>6</sub> , 850 MHz) ..... | S10 |
| <b>Figure S9.</b> The HR-ESI-MS data of <b>5</b> .....                                                      | S11 |
| <b>Figure S10.</b> The <sup>1</sup> H NMR spectrum of <b>5</b> (CD <sub>3</sub> OD, 850 MHz) .....          | S12 |
| <b>Figure S11.</b> The HR-ESI-MS data of <b>6</b> .....                                                     | S13 |
| <b>Figure S12.</b> The <sup>1</sup> H NMR spectrum of <b>6</b> (CD <sub>3</sub> OD, 850 MHz) .....          | S14 |
| <b>Figure S13.</b> The HR-ESI-MS data of <b>7</b> .....                                                     | S15 |
| <b>Figure S14.</b> The <sup>1</sup> H NMR spectrum of <b>7</b> (CD <sub>3</sub> OD, 850 MHz) .....          | S16 |
| <b>Figure S15.</b> The HR-ESI-MS data of <b>8</b> .....                                                     | S17 |
| <b>Figure S16.</b> The <sup>1</sup> H NMR spectrum of <b>8</b> (CD <sub>3</sub> OD, 850 MHz) .....          | S18 |
| <b>Figure S17.</b> The HR-ESI-MS data of <b>9</b> .....                                                     | S19 |
| <b>Figure S18.</b> The <sup>1</sup> H NMR spectrum of <b>9</b> (CD <sub>3</sub> OD, 850 MHz) .....          | S20 |

**Figure S1.** The HR-ESIMS data of **1**

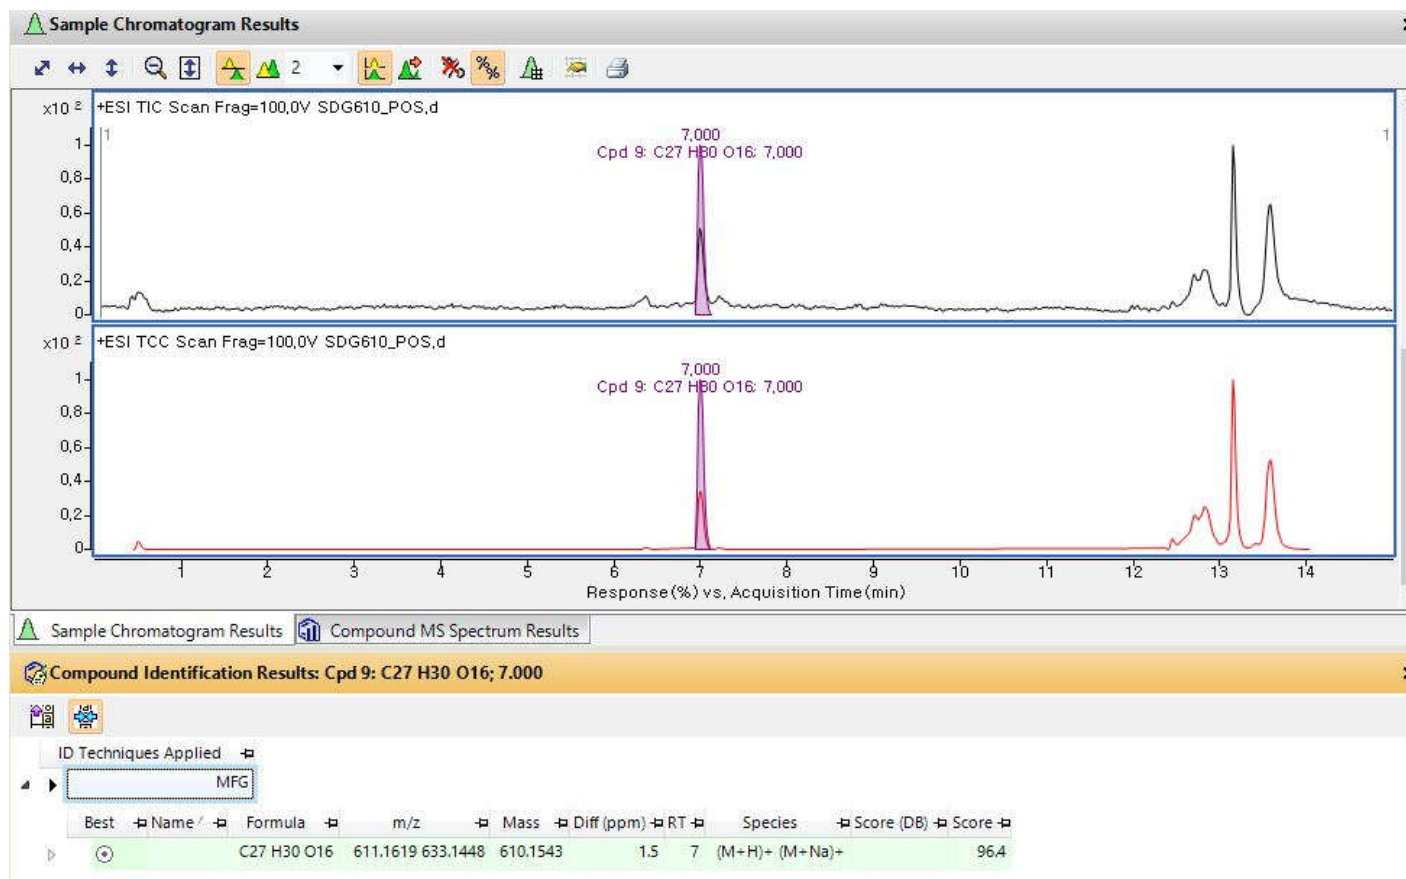

**Figure S2.** The  $^1\text{H}$  NMR spectrum of **1** (DMSO- $d_6$ , 850 MHz)

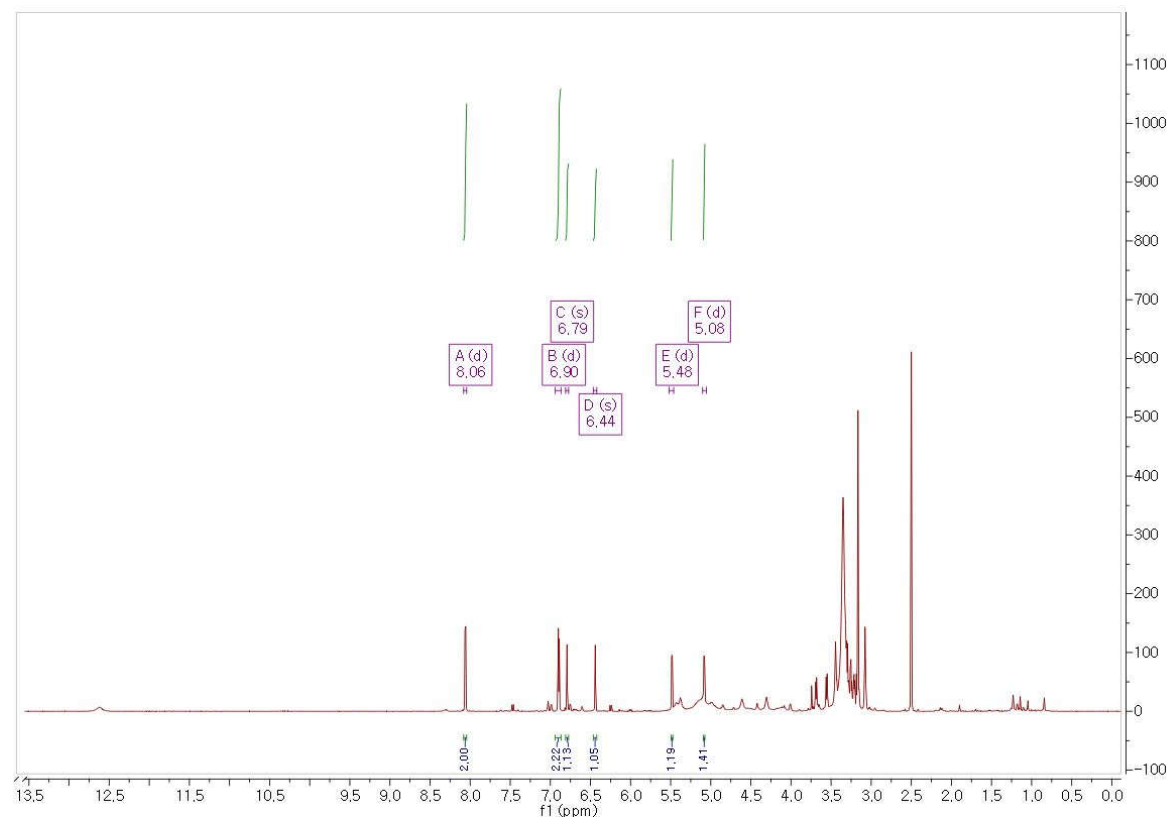

**Figure S3.** The HR-ESIMS data of **2**

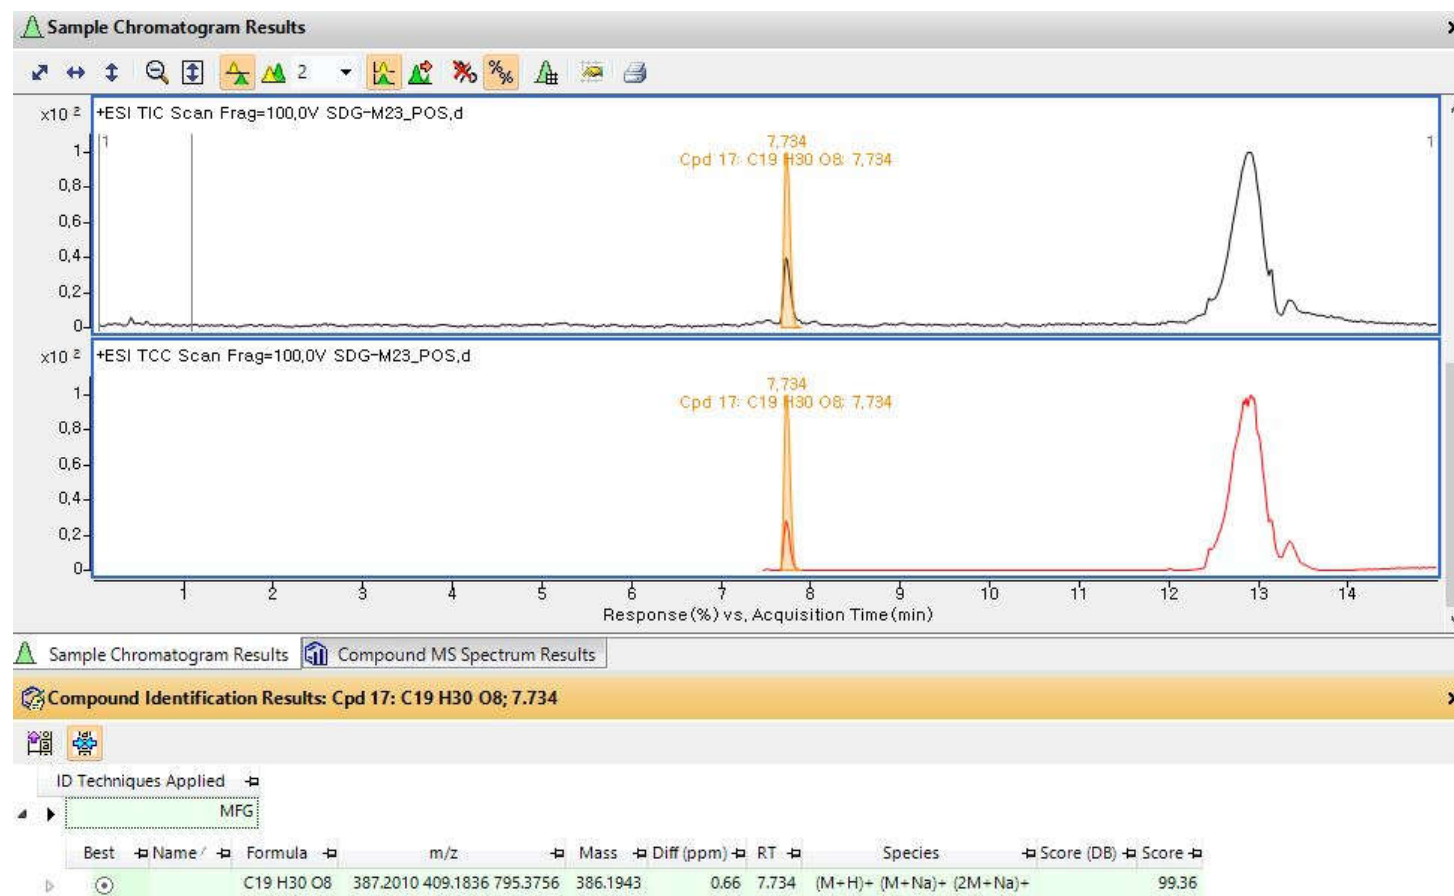

**Figure S4.** The  $^1\text{H}$  NMR spectrum of **2** (DMSO- $d_6$ , 850 MHz)

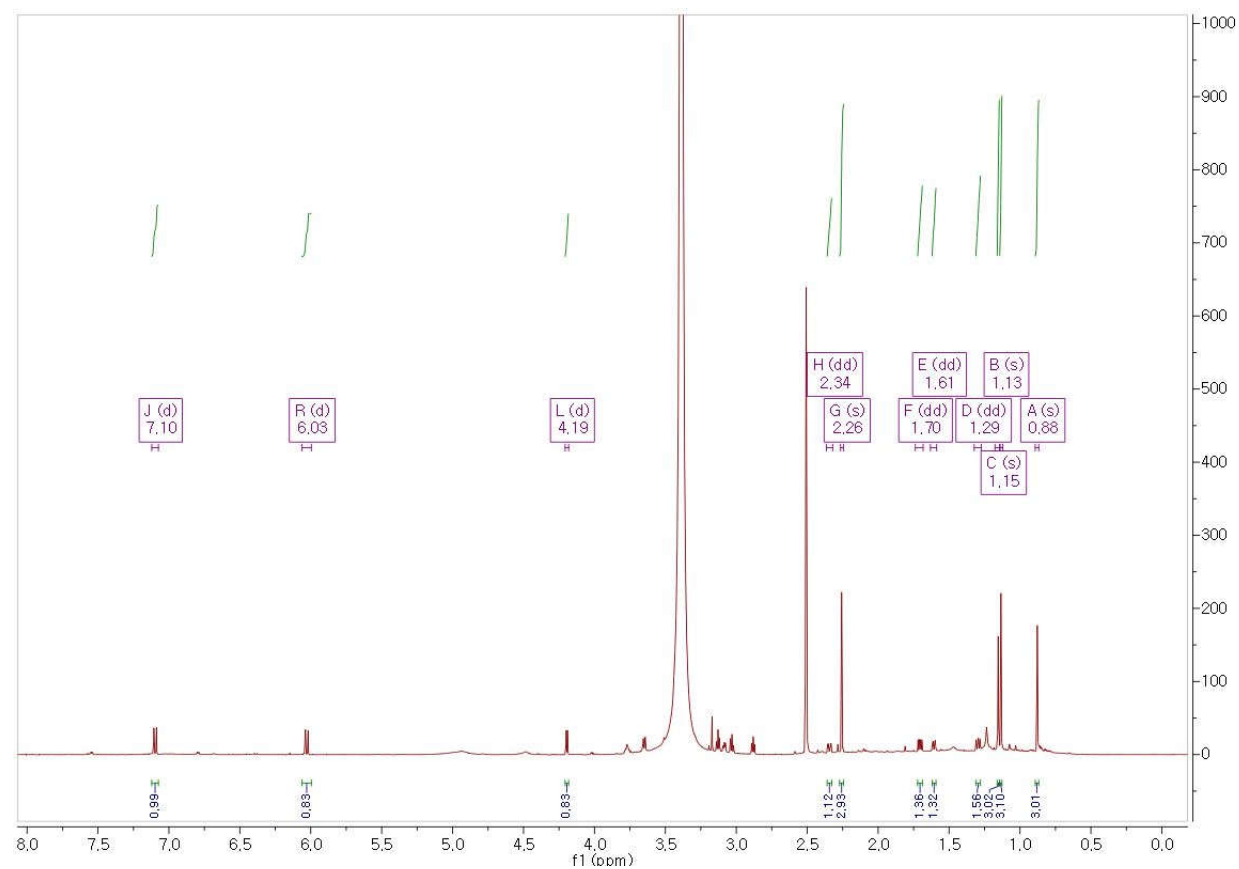

**Figure S5.** The HR-ESIMS data of **3**

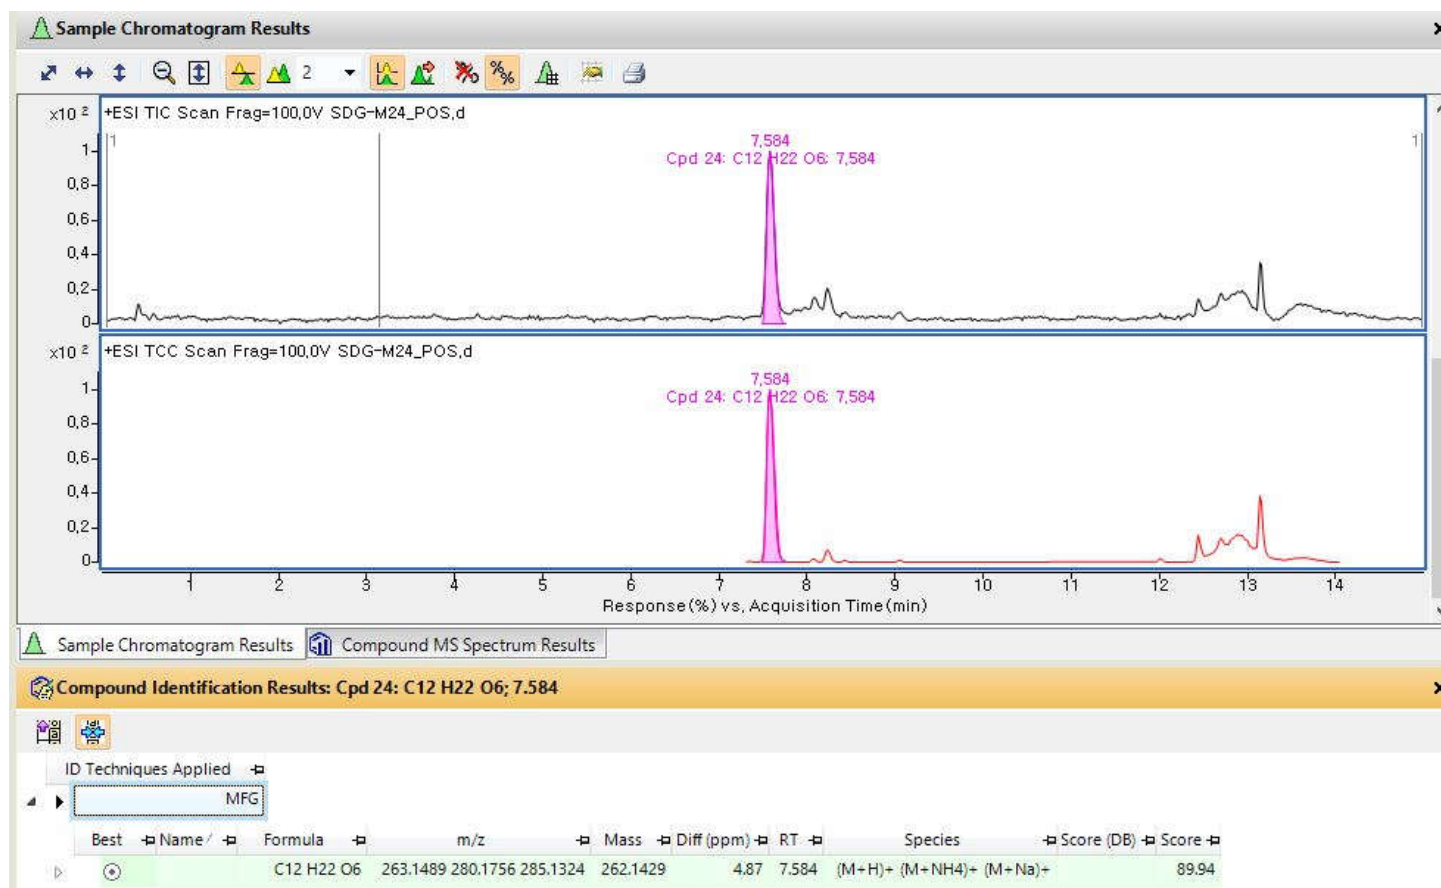

**Figure S6.** The  $^1\text{H}$  NMR spectrum of **3** (DMSO- $d_6$ , 850 MHz)

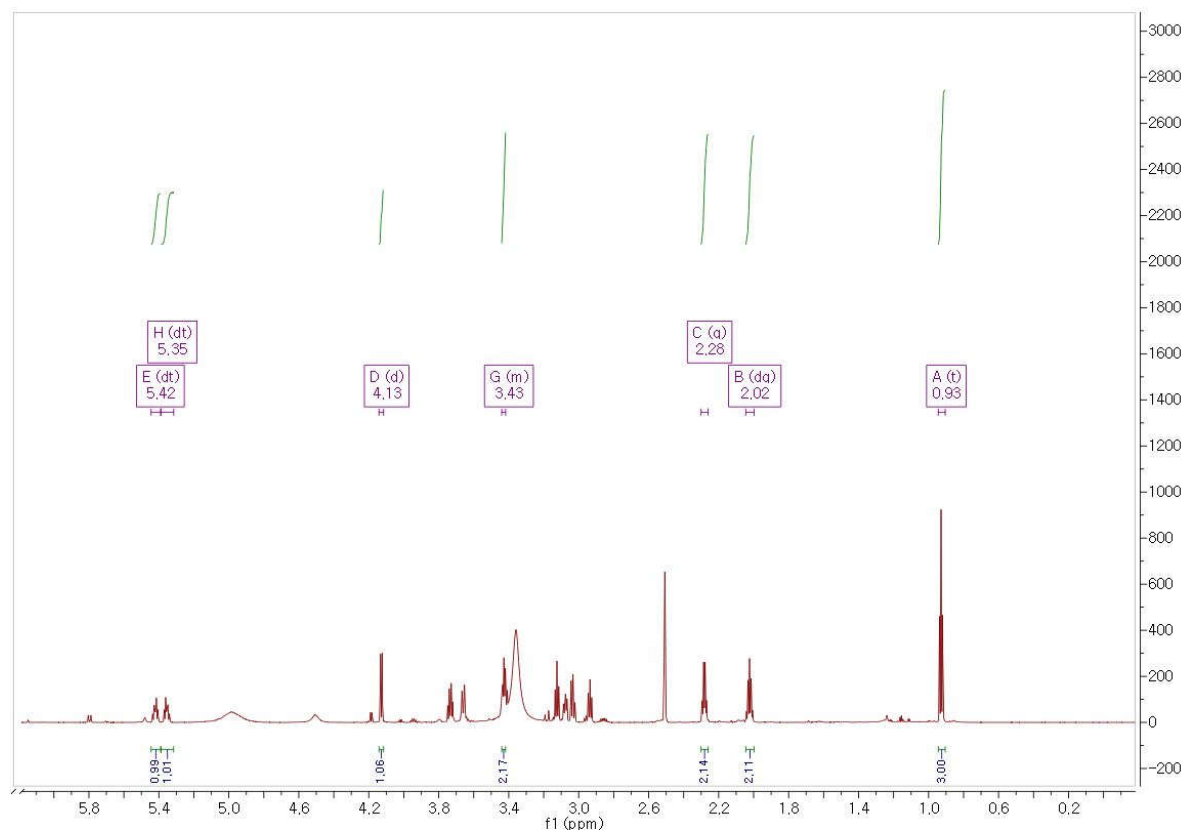



**Figure S7.** The HR-ESIMS data of **4**

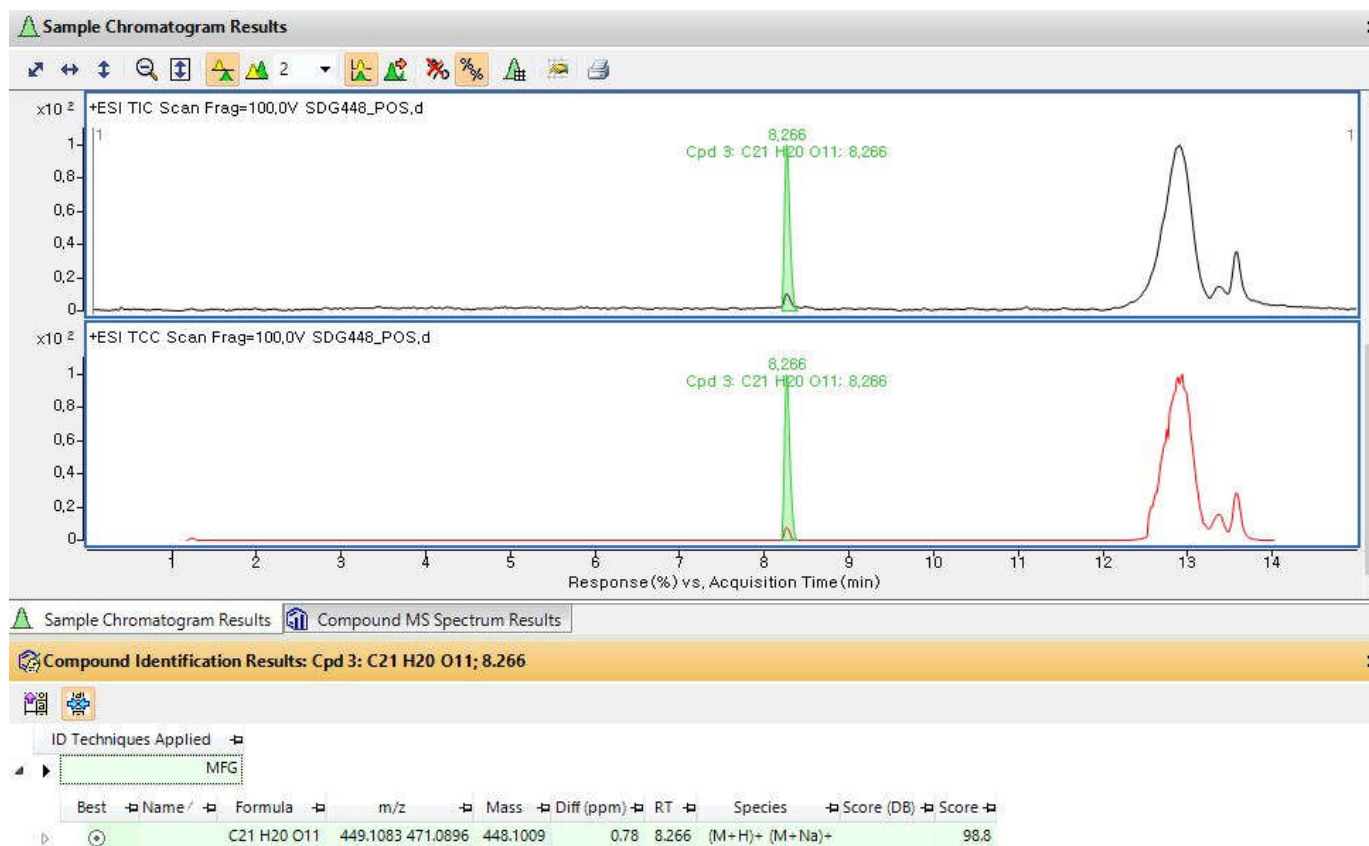

**Figure S8.** The  $^1\text{H}$  NMR spectrum of **4** (DMSO- $d_6$ , 850 MHz)

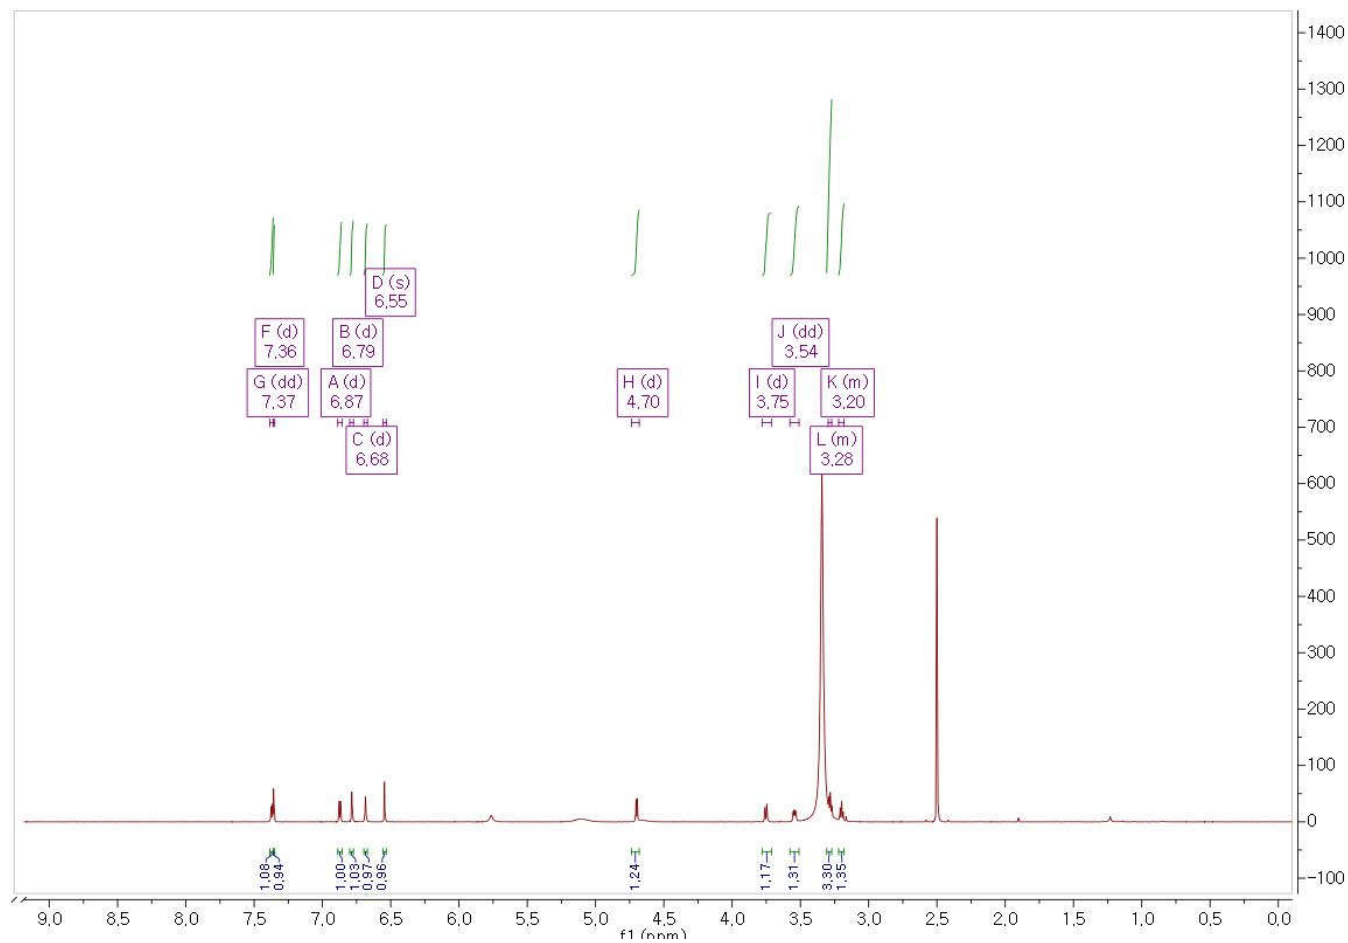

**Figure S9.** The HR-ESIMS data of **5**

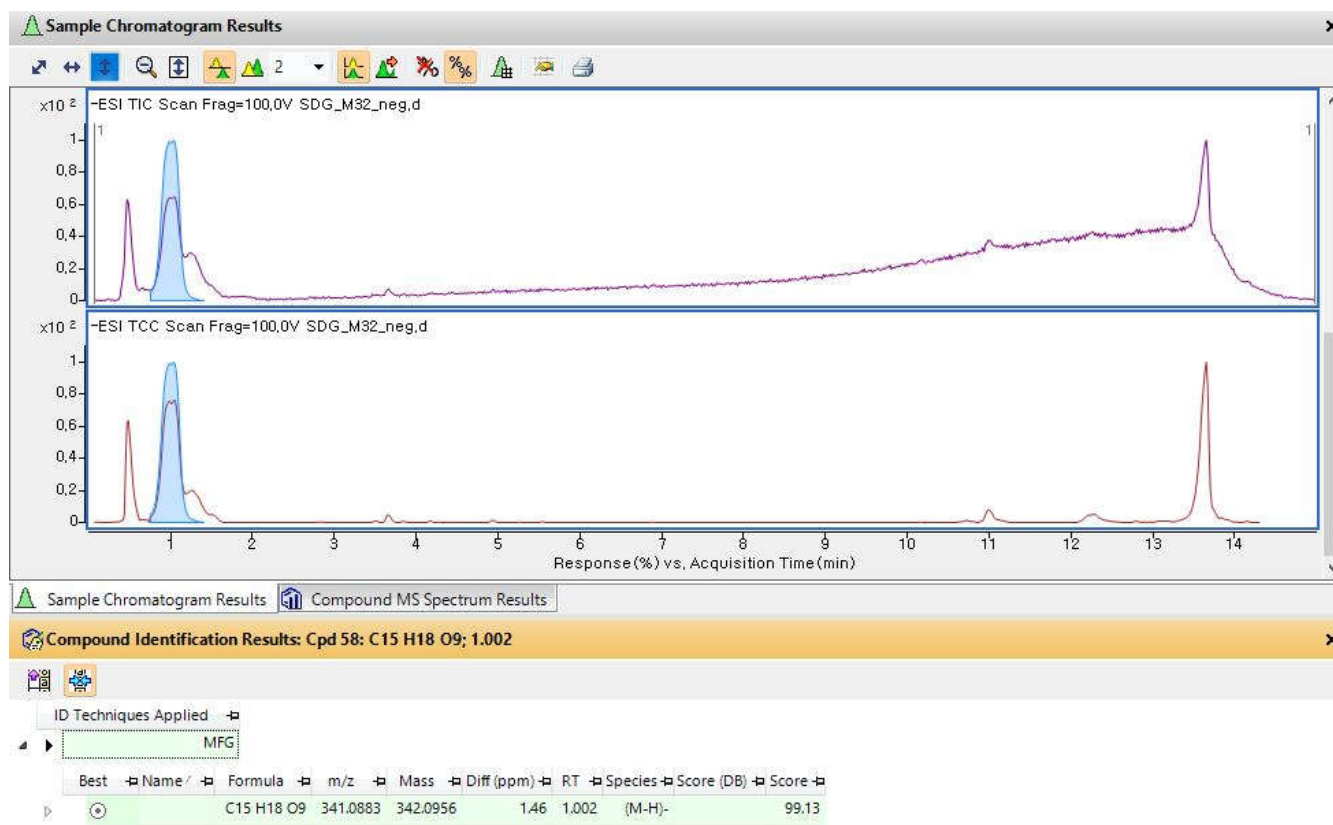

**Figure S10.** The  $^1\text{H}$  NMR spectrum of **5** ( $\text{CD}_3\text{OD}$ , 850 MHz)

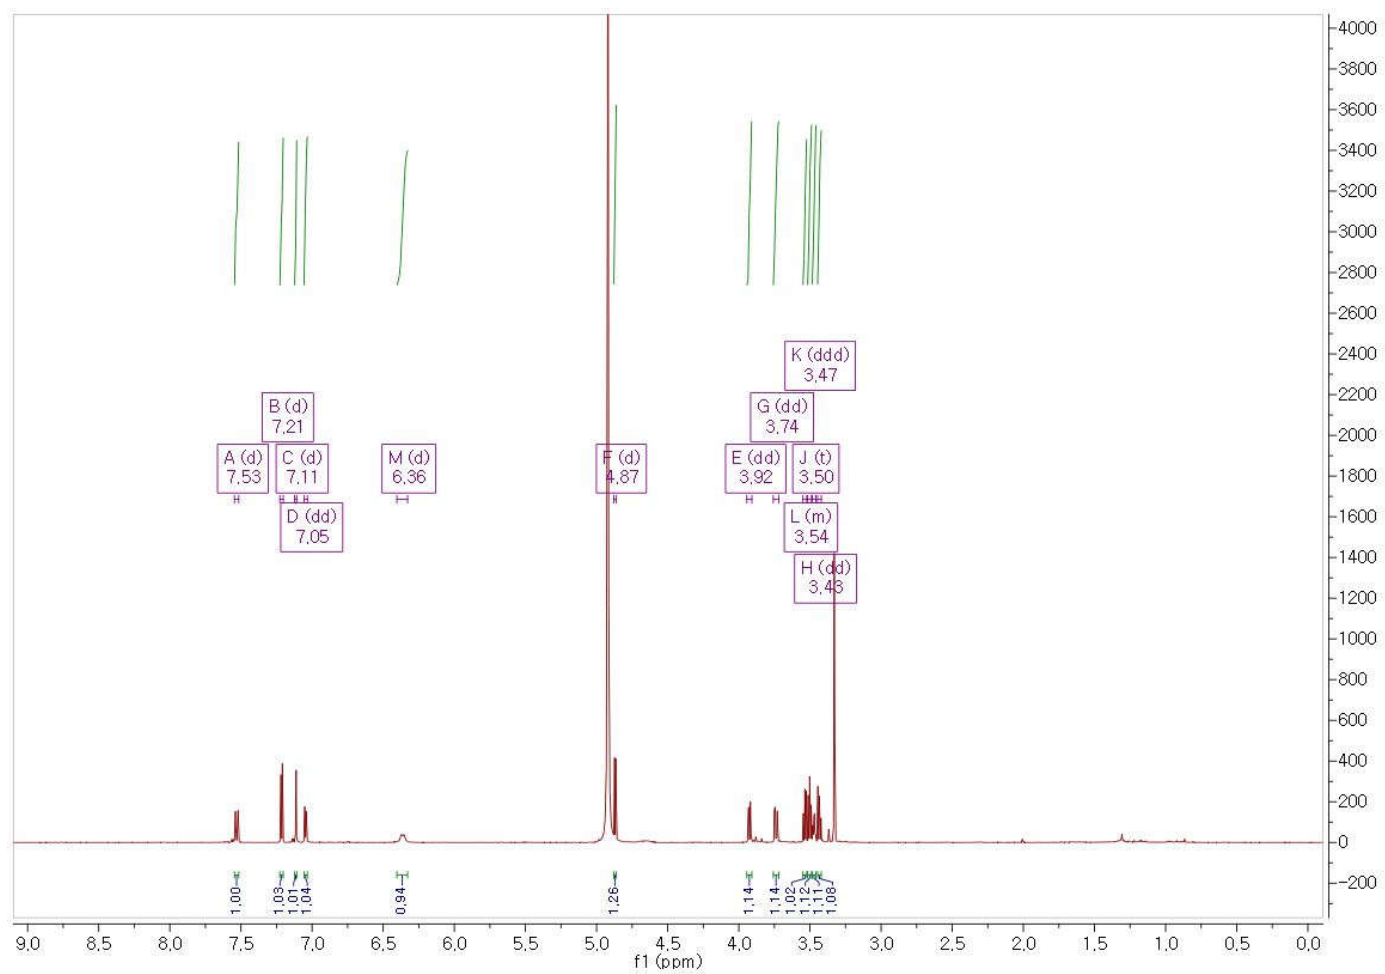

**Figure S11.** The HR-ESIMS data of **6**

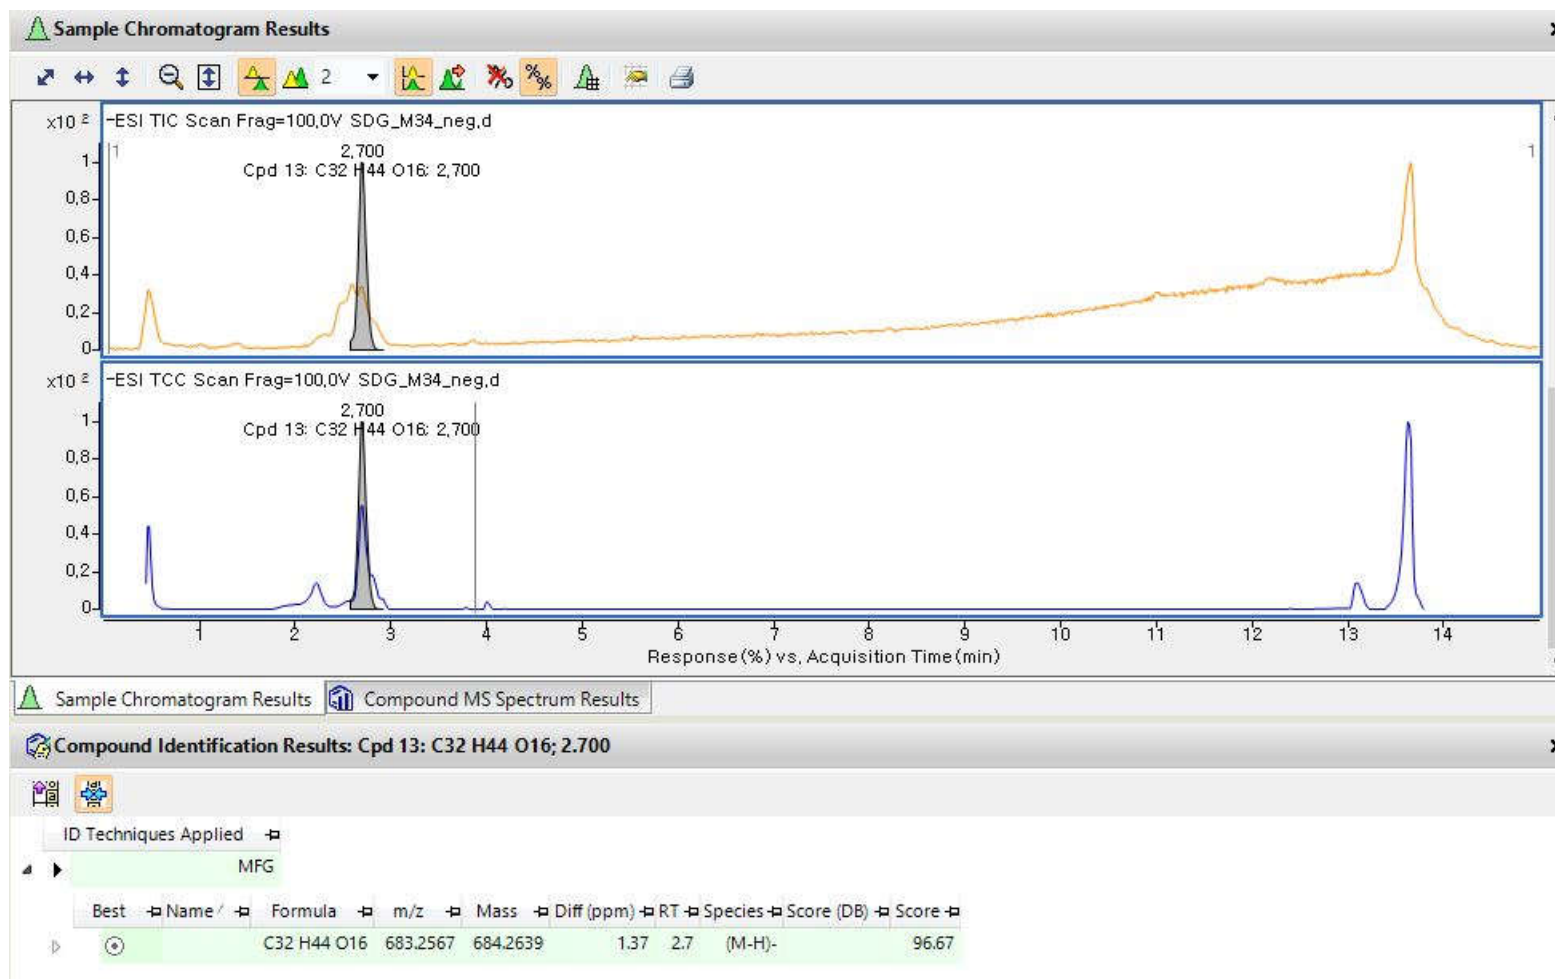

**Figure S12.** The  $^1\text{H}$  NMR spectrum of **6** ( $\text{CD}_3\text{OD}$ , 850 MHz)

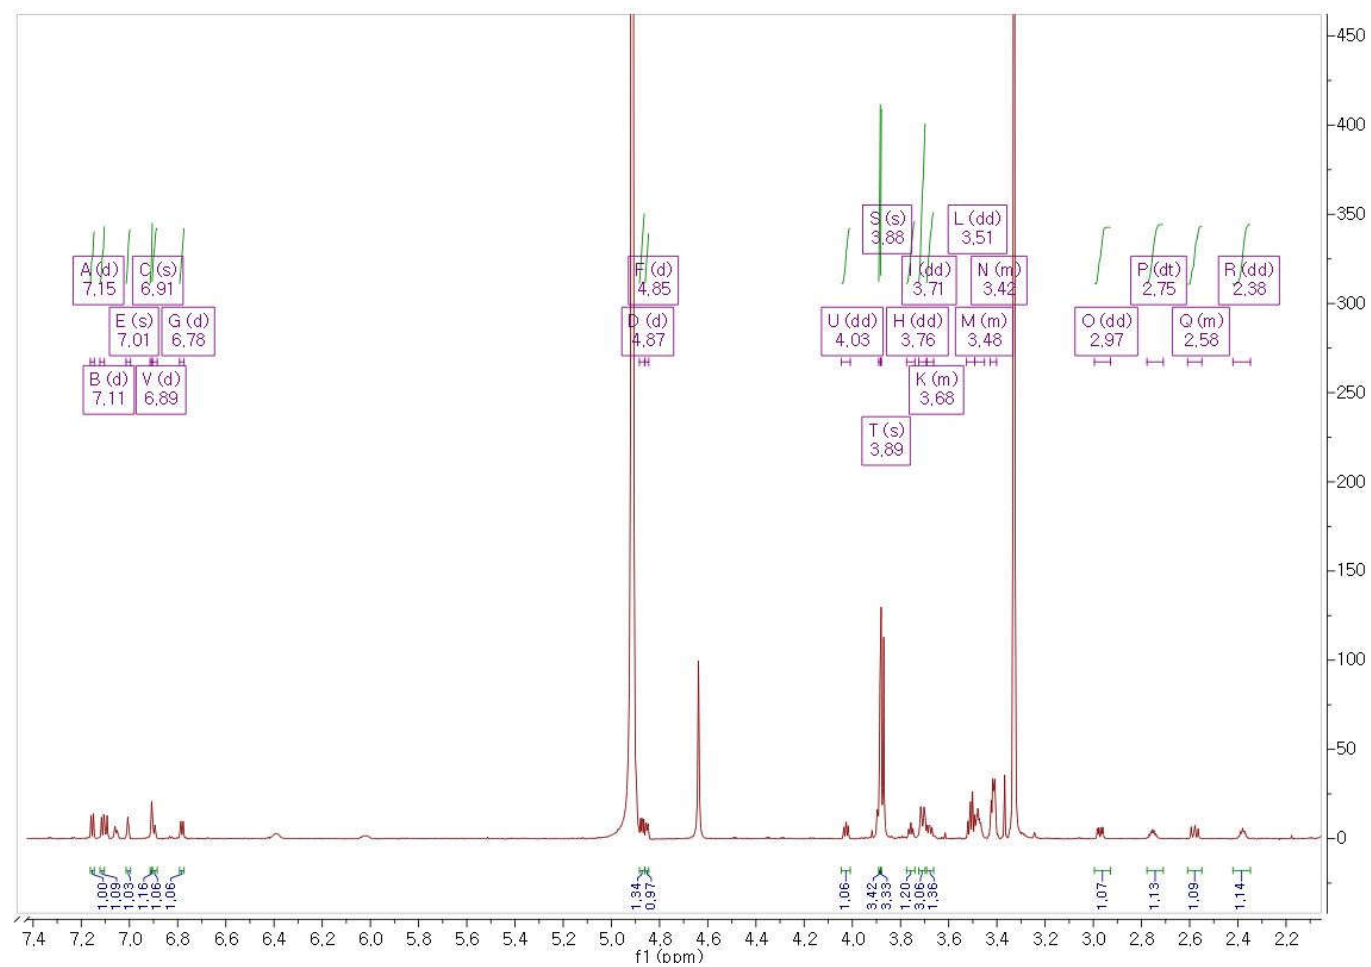

**Figure S13.** The HR-ESIMS data of **7**

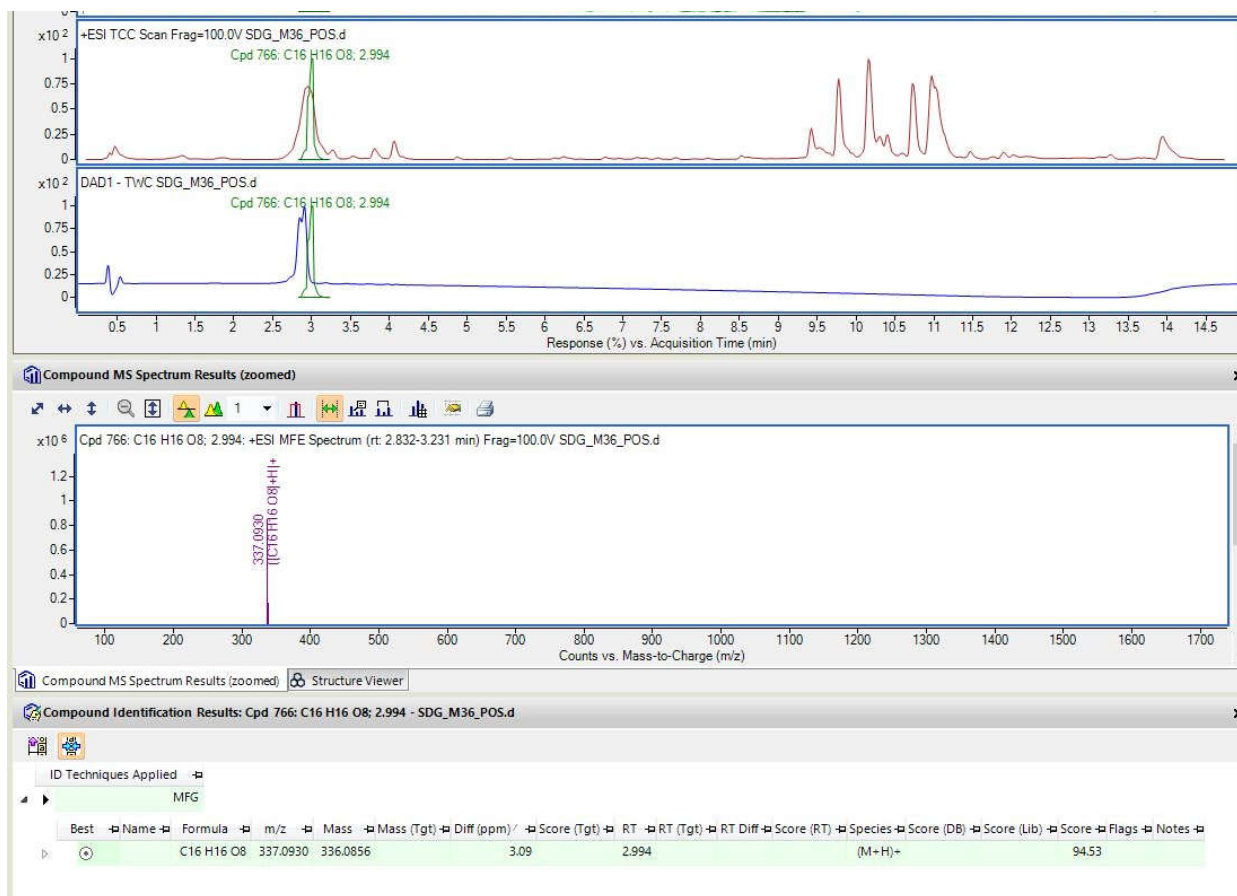

**Figure S14.** The  $^1\text{H}$  NMR spectrum of **7** ( $\text{CD}_3\text{OD}$ , 850 MHz)

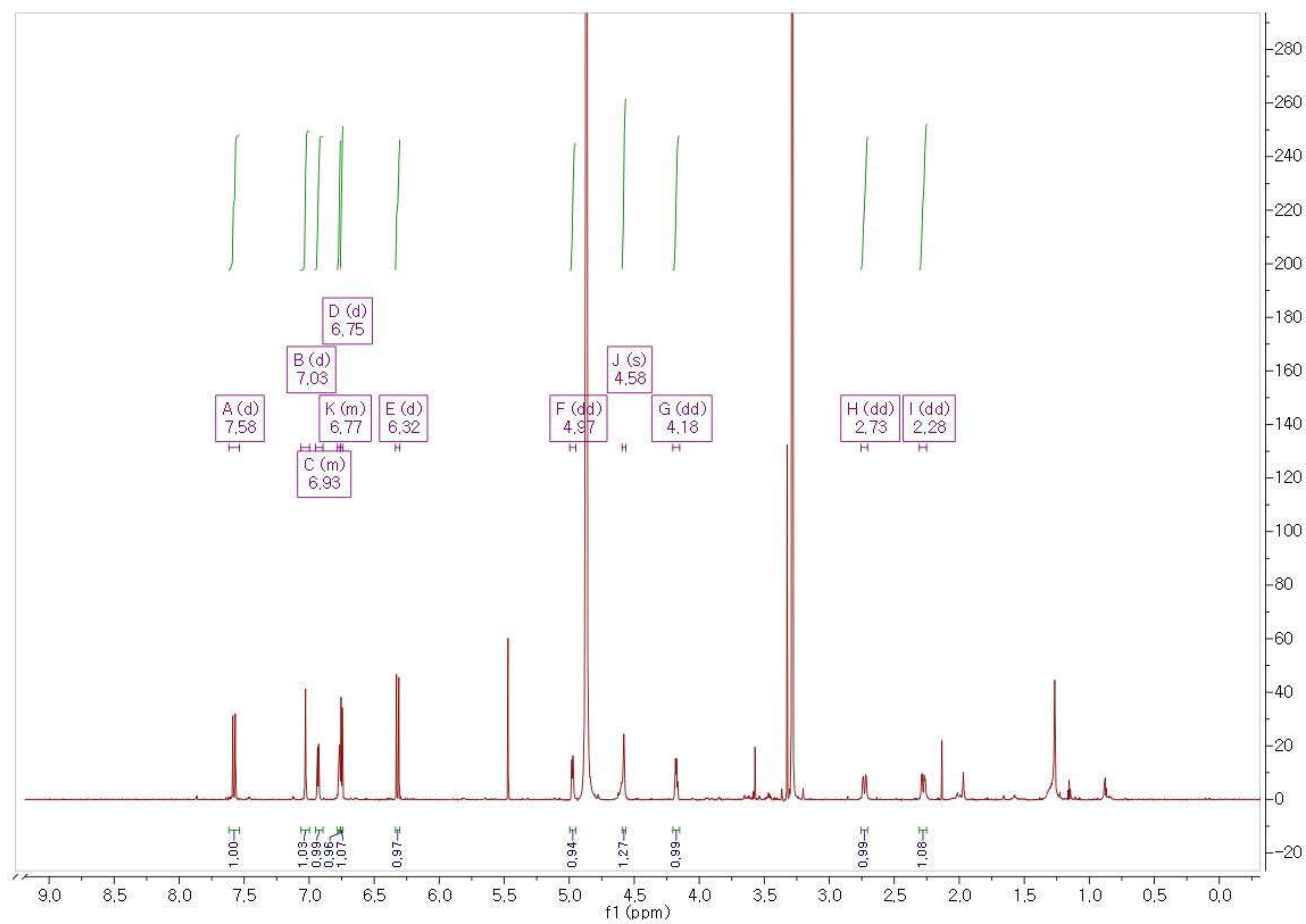



**Figure S15.** The HR-ESIMS data of **8**

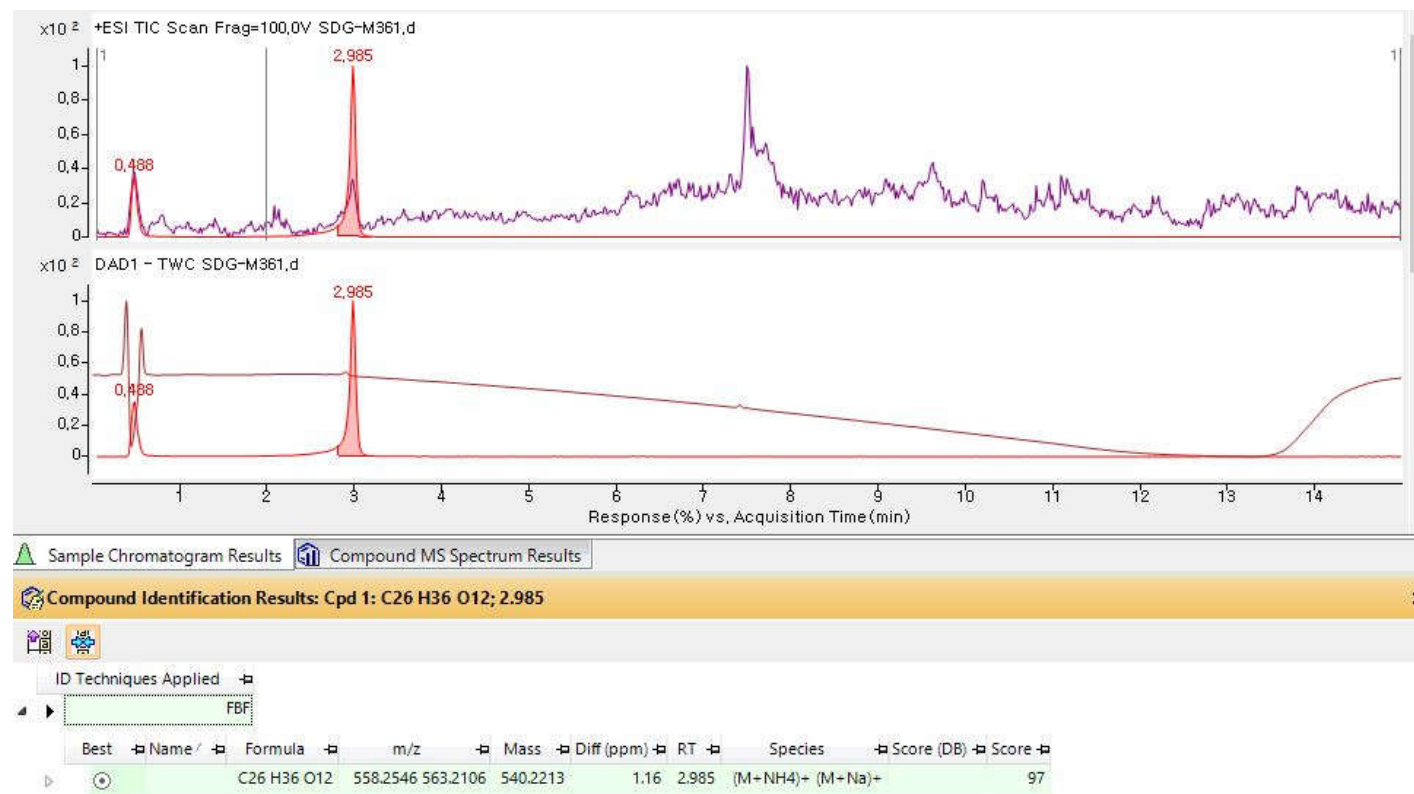

**Figure S16.** The  $^1\text{H}$  NMR spectrum of **8** ( $\text{CD}_3\text{OD}$ , 850 MHz)

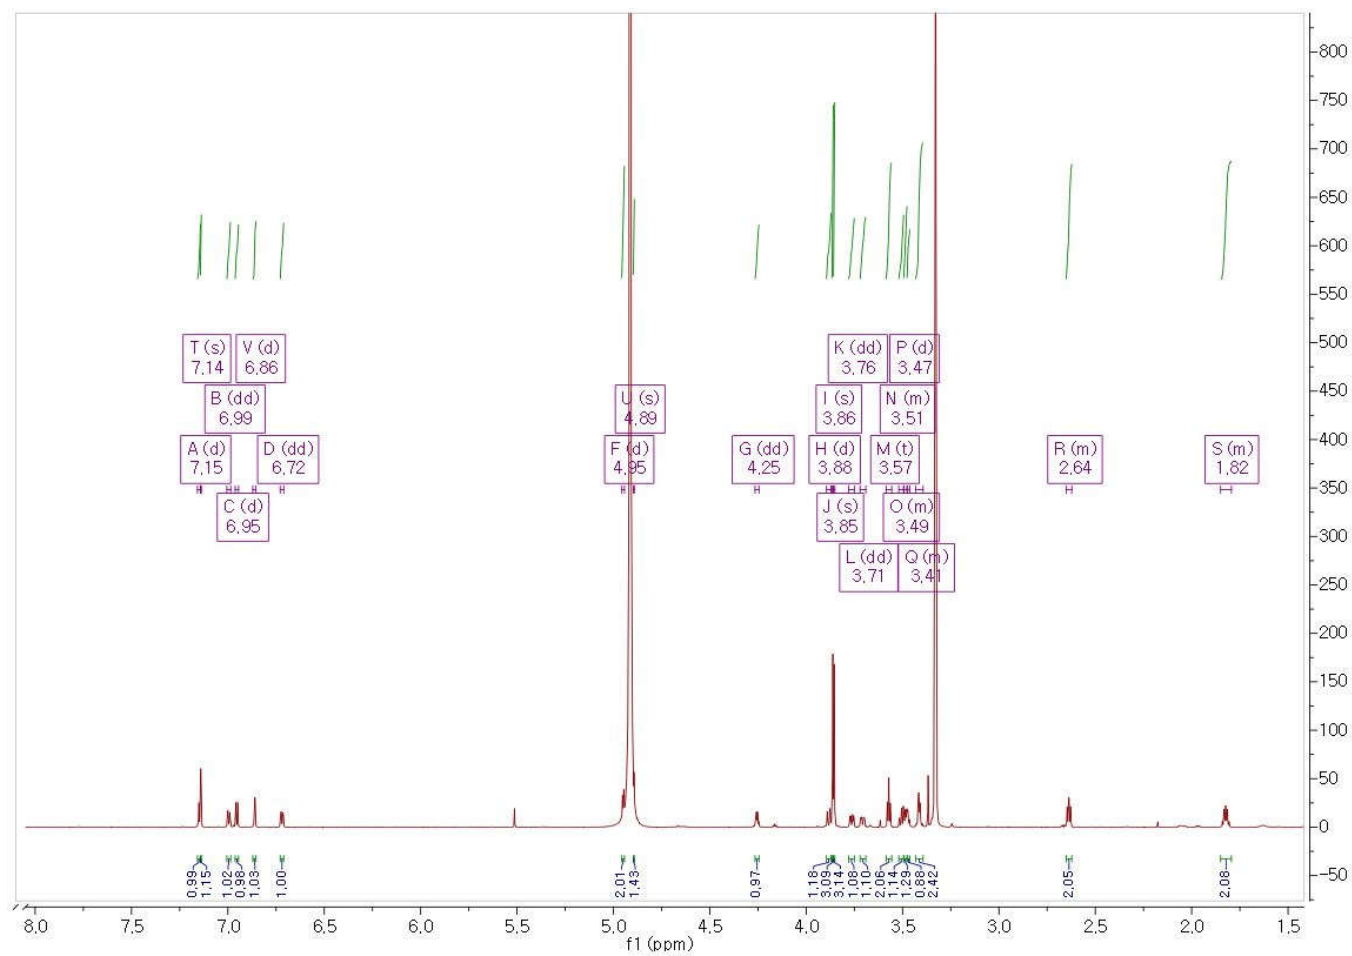

**Figure S17.** The HR-ESIMS data of **9**

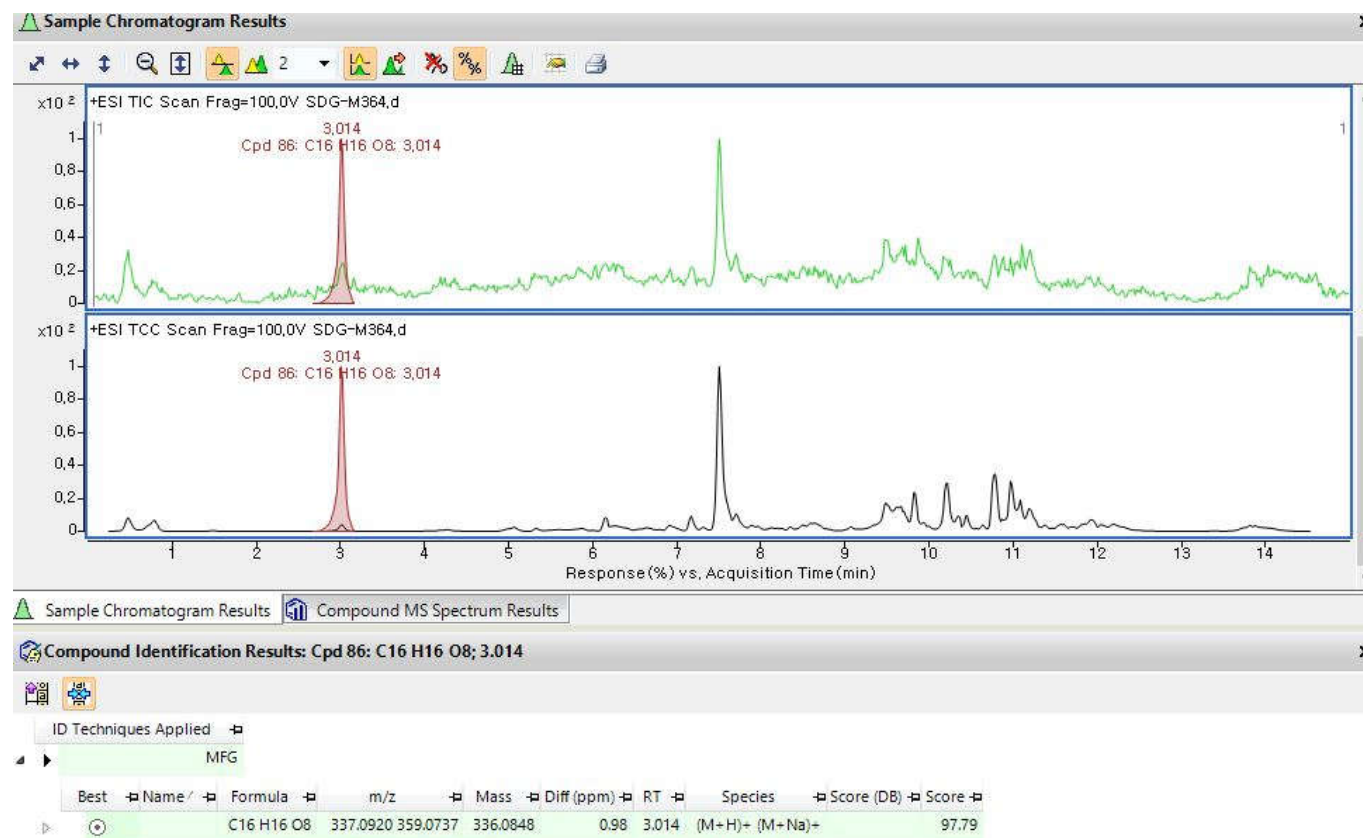

**Figure S18.** The  $^1\text{H}$  NMR spectrum of **9** ( $\text{CD}_3\text{OD}$ , 850 MHz)

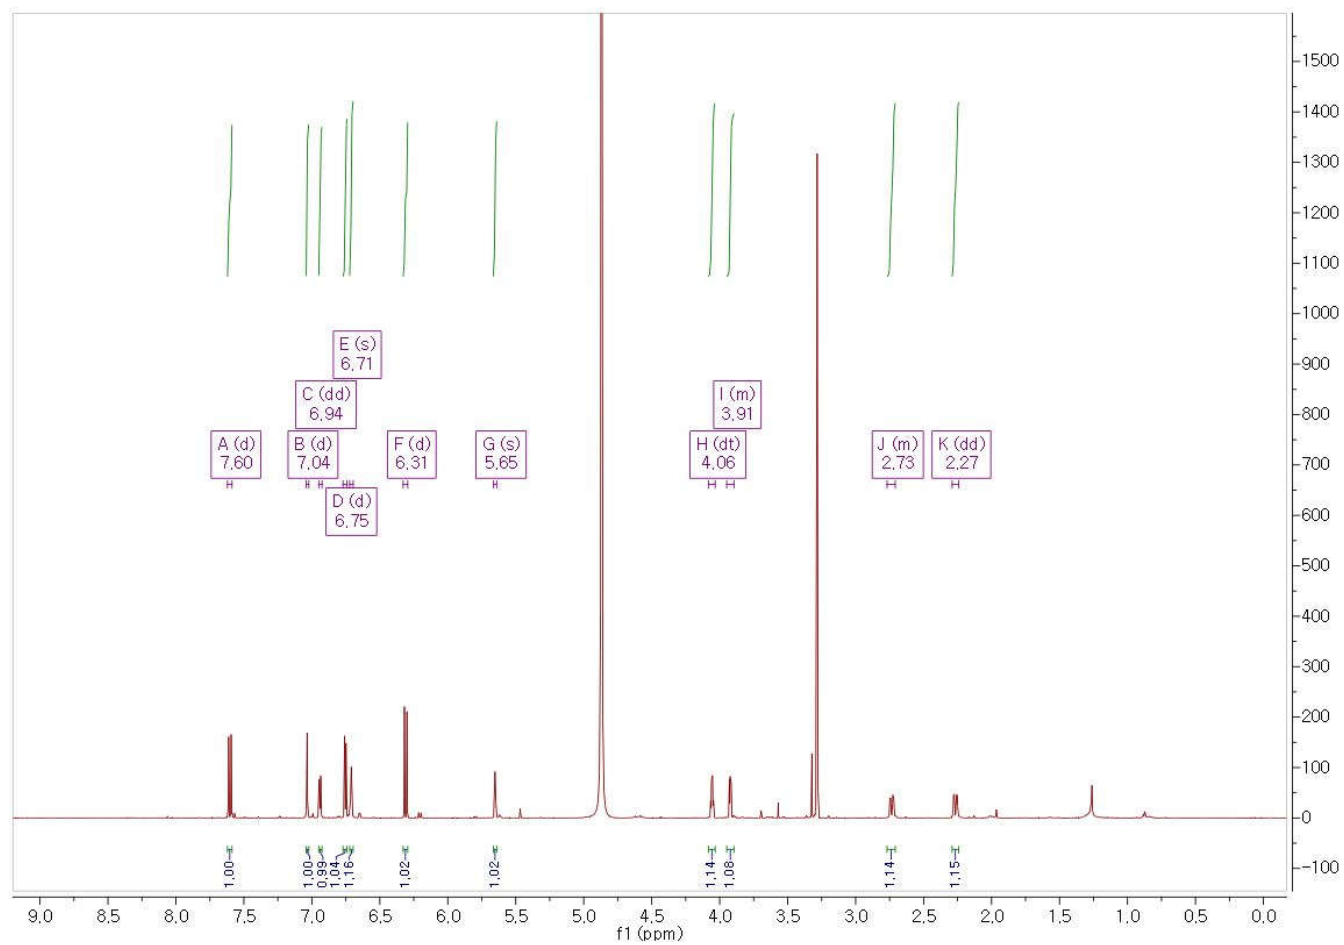

Supplement: s1 [file s1]
